# Supplementary material for: Protein Kinase D Isoforms Differentially Modulate Cofilin-Driven Directed Cell Migration
Source: PubMed Central journal article supplement (PMC4026536; doi:10.1371/journal.pone.0098090), 2014-05-19

Supplemental Figure S3

**A**

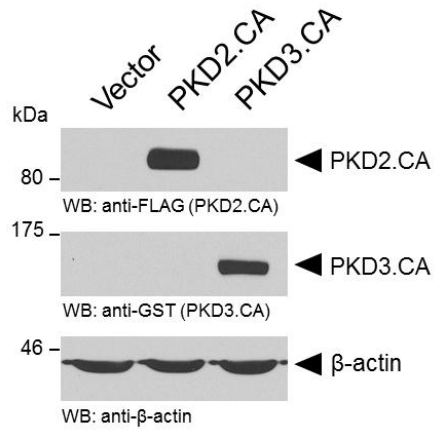

**B**

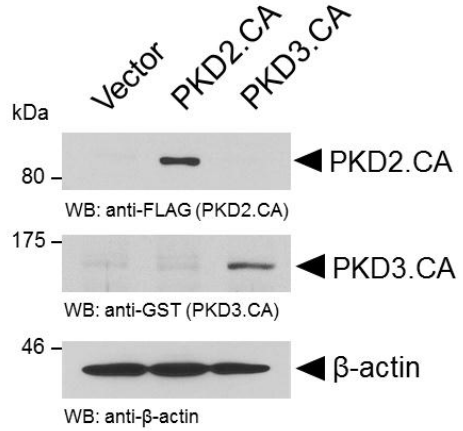

Supplement: pone.0098090.s003.pdf [file pone.0098090.s003.pdf]
